# Supplementary material for: Preparation and visible light photocatalytic activity of Ag/TiO2/graphene nanocomposite
Source: Royal Society of Chemistry journal article supplement (doi:10.1039/c1nr10604j), 2011-01-01
Supplement: c1nr10604j.pdf [file c1nr10604j.pdf]

## Electronic Supplementary Information

### Preparation and visible light photocatalytic activity of Ag/TiO<sub>2</sub>/graphene nanocomposite

Yanyuan Wen, Hanming Ding,\* Yongkui Shan

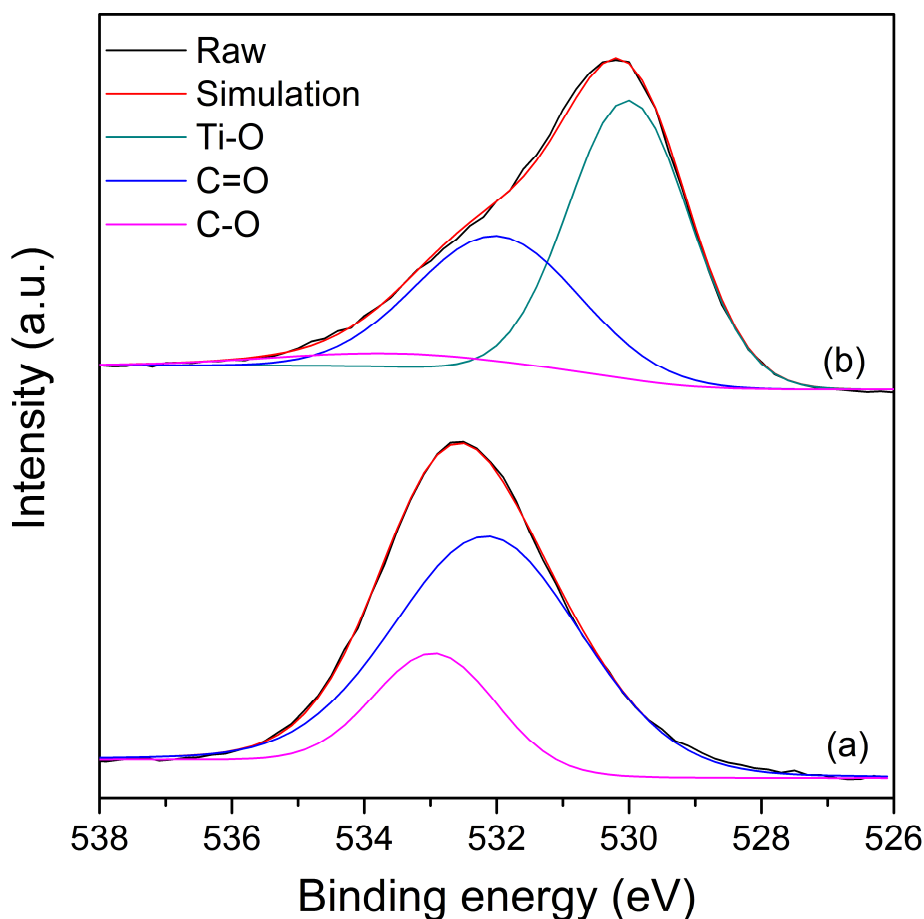

**Figure 1S.** O1s XPS spectra of (a) GO and (b) Ag/TiO<sub>2</sub>/G.

In the O1s XPS spectra of GO, two peaks at 532 and 533.5 eV are attributed to C=O and C-O, respectively. However, the peak intensities of these two peaks decreased remarkably in the O1s XPS spectra of Ag/TiO<sub>2</sub>/G nanocomposite, especially for the C-O species. The existence of C=O species suggests that some carboxyl groups were kept under the hydrothermal conditions, which is consistent with the C1s XPS spectra (Figure 4). The peak near 530 eV should be assigned to Ti-O in TiO<sub>2</sub>.

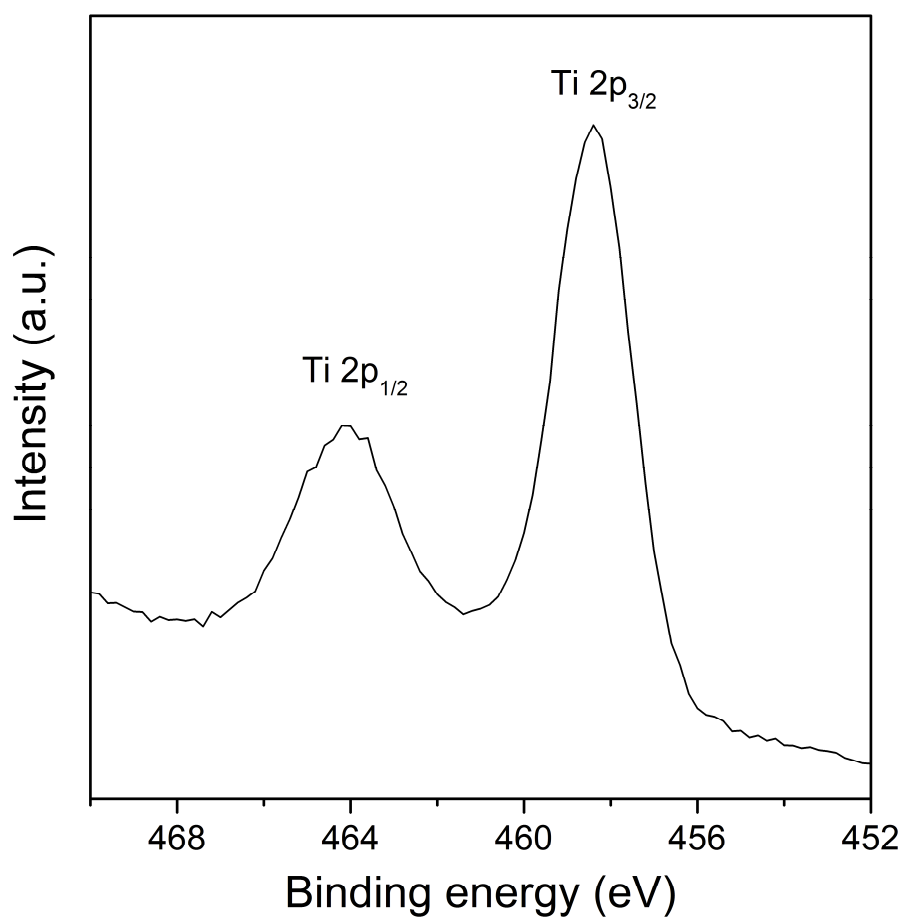

**Figure 2S.** Ti2p XPS spectrum of Ag/TiO<sub>2</sub>/G.
